# Supplementary material for: Reliability of Urinary Charged Metabolite Concentrations in a Large-Scale Cohort Study Using Capillary Electrophoresis-Mass Spectrometry
Source: Research Square preprint supplement (doi:10.21203/rs.3.rs-110925/v1), 2020-11-25
Supplement: Supplementary file 1 [file 5521e3a1af56fb3dcec0371f.xlsx]

## Sheet: Sheet1
Table S1. Urine dulation protocol.
Creatinine concentration	Dilution rate	Urine	2m M IS 1,2§1§2 and Milli-Q	Milli-Q
100mg/dl ~	20-fold	10μL	20μg	170μL
50~99mg/dl	10-fold	20μL	20μg	160μL
25~49mg/dl	5-fold	40μL	20μg	140μL
10-24mg/dl	2-fold	100μL	20μg	80μL
~9mg/dl	1.11-fold	180μL	20μg	0μL
§1 IS1: L-Methionine sulfone (Wako 502-76641), and CSA (Wako 037-01032) MES (Dojindo 349-01623).
§2 IS2: 3-Aminopyrrolidine (Aldrich 404624) and Trimesate (Wako 206-03641)
