# Supplementary material for: Reliability of Urinary Charged Metabolite Concentrations in a Large-Scale Cohort Study Using Capillary Electrophoresis-Mass Spectrometry
Source: Research Square preprint supplement (doi:10.21203/rs.3.rs-110925/v1), 2020-11-25
Supplement: Supplementary file 2 [file 7d910cb3253a338caf639f26.xlsx]

## Sheet: S2 Table
Table S2. Statistical summary of measured metabolites.
Metabolite name		QC samples				Participant samples													Estimated ICC*		Metabolite name
		Total CV	Inter-batch CV	Intra-batch CV		Total CV	Inter-batch CV	Intra-batch CV		Mean (µmol/L)	SD	1st quartile	Median	3rd Quartile	Number of ND	% of ND	Lowest detection value
Cations																					Cations
Gly		0.0553643	0.0410302	0.036758		0.690371	0.210516	0.659474		75.3279	52.0042	42.0818	61.017	91.355	0	0	5.1122		0.993569		Gly
Trimethylamine N-oxide		0.109796	0.0905732	0.0583971		1.14959	0.302074	1.1109		63.957	73.5244	21.4672	36.2491	77.1016	19	0.00282738	0.10927		0.990878		Trimethylamine N-oxide
beta-Ala		0.180931	0.0693394	0.167471		0.914355	0.155447	0.901227		1.26106	1.15305	0.660182	1.14281	1.68818	1080	0.160714	0.152884		0.960844		beta-Ala
Ala		0.0580892	0.0393266	0.0431476		0.697226	0.142189	0.683049		21.0723	14.6922	13.1078	17.9546	25.3729	0	0	3.26076		0.993059		Ala
3-Aminoisobutyrate		0.0660626	0.051225	0.0410721		1.14249	0.115358	1.1368		49.8359	56.9371	6.19798	18.9754	95.5113	0	0	0.434819		0.996656		3-Aminoisobutyrate
2AB		0.19599	0.077627	0.179001		0.829841	0.139711	0.817977		1.09612	0.909605	0.751256	1.01687	1.35323	292	0.0434524	0.197435		0.94422		2AB
N,N-Dimethylglycine		0.0945947	0.054254	0.0770598		3.26822	0.172573	3.26389		6.90813	22.5773	3.62426	5.30815	7.7181	13	0.00193452	0.340879		0.999162		N,N-Dimethylglycine
Choline		0.129344	0.106389	0.0746468		0.497473	0.149607	0.474443		3.49828	1.7403	2.46396	3.19531	4.10205	0	0	0.846599		0.932399		Choline
Ser		0.059239	0.0416133	0.0411804		0.547357	0.117524	0.535252		32.8926	18.004	23.044	29.4825	38.7117	34	0.00505952	0.400424		0.988287		Ser
Pro		0.178141	0.0777594	0.159747		1.42588	0.197023	1.41264		0.93199	1.32891	0.550362	0.754682	1.02873	487	0.0724702	0.15494		0.984392		Pro
Guanidinoacetate		0.0647165	0.0489812	0.040864		0.500295	0.16129	0.475228		59.2028	29.6189	37.2241	54.3595	75.972	0	0	2.40547		0.983267		Guanidinoacetate
Val		0.157626	0.0788078	0.136564		2.86664	0.141293	2.86322		4.26135	12.2158	3.24094	3.98572	4.81596	109	0.0162202	0.262278		0.996977		Val
Betaine		0.111733	0.0632971	0.0920708		1.4866	0.223984	1.47051		19.9358	29.6365	8.71788	12.7042	20.2131	21	0.003125	1.30451		0.994351		Betaine
Thr		0.0491185	0.028297	0.0401542		0.953546	0.175197	0.937563		15.5837	14.8598	9.22612	12.6772	18.0331	2	0.000297619	1.3074		0.997347		Thr
Taurine		0.114636	0.102361	0.0548761		0.700992	0.156878	0.682731		172.267	120.757	96.355	150.228	216.958	5	0.000744048	5.85034		0.973257		Taurine
Creatine		0.0520411	0.0372239	0.0368632		1.53783	0.412752	1.48149		72.9474	112.181	7.72682	20.5756	93.0556	0	0	1.69823		0.998855		Creatine
Ile		0.226911	0.14991	0.171277		13.8457	0.642718	13.831		1.5177	21.0136	0.940867	1.17595	1.46959	47	0.00699405	0.0561648		0.999731		Ile
Leu		0.0764401	0.03902	0.0655429		3.65524	0.129968	3.65298		3.49345	12.7694	2.54752	3.14344	3.87057	37	0.00550595	0.0982451		0.999563		Leu
Asn		0.0920473	0.0442984	0.0807232		0.81251	0.149695	0.798915		11.9213	9.68617	7.84066	10.2512	13.7966	14	0.00208333	1.79111		0.987166		Asn
Ornithine		0.145274	0.0692467	0.128289		1.78737	0.194766	1.77738		1.9355	3.45946	1.15942	1.51268	2.03947	40	0.00595238	0.330551		0.993394		Ornithine
Asp		1.37118	0.844486	1.07814		3.34838	0.508102	3.30942		0.304663	1.02013	0.0950887	0.0950887	0.0950887	5529	0.822768	0.190177		0.832307		Asp
Hypoxanthine		0.069146	0.0484323	0.0500884		0.497574	0.175734	0.466309		13.0652	6.5009	8.87857	12.2799	16.1754	2	0.000297619	1.02825		0.980688		Hypoxanthine
1-Methylnicotinamide		0.162504	0.12802	0.0895773		0.466102	0.168792	0.433416		10.3976	4.84636	6.97108	9.70522	12.9756	0	0	0.651568		0.878447		1-Methylnicotinamide
Trigonelline		0.115564	0.0655088	0.0947305		0.933414	0.201029	0.912101		16.1608	15.0847	6.56422	11.3724	20.4986	1	0.00014881	0.50864		0.984672		Trigonelline
Urocanate		0.267409	0.178297	0.206405		2.21803	0.159503	2.21232		2.34363	5.19824	1.63194	2.25928	2.95557	781	0.11622	0.277495		0.985465		Urocanate
Proline betaine		0.117278	0.0650392	0.0974842		1.4649	0.326288	1.42923		15.2021	22.2696	3.61831	6.79628	16.9541	4	0.000595238	0.554442		0.993591		Proline betaine
gamma-Butyrobetaine		0.213157	0.0860086	0.194944		1.12619	0.18242	1.11244		0.35678	0.401802	0.0904207	0.267805	0.48267	1569	0.233482	0.0353135		0.964176		gamma-Butyrobetaine
Gln		0.0600076	0.0451515	0.0376117		0.843538	0.151129	0.830563		60.944	51.4086	41.801	55.163	72.8977	2	0.000297619	5.66847		0.994939		Gln
Lys		0.0548165	0.0373042	0.0400709		1.41261	0.183364	1.40107		40.8019	57.6372	15.2021	26.1636	46.9821	0	0	2.52443		0.998494		Lys
Glu		0.157758	0.0737142	0.138576		0.655115	0.133306	0.64129		2.30306	1.50877	1.60746	2.15529	2.7819	165	0.0245536	0.371818		0.942011		Glu
Met		0.258906	0.0887964	0.242669		1.78895	0.132332	1.78411		1.45501	2.60294	1.06731	1.36226	1.71088	230	0.0342262	0.282871		0.979055		Met
His		0.065486	0.0533313	0.0396721		0.553697	0.10155	0.544783		85.9472	47.5887	54.0462	76.9929	107.968	0	0	2.55866		0.986012		His
alpha-Aminoadipate		0.0829976	0.0378291	0.0736868		1.1989	0.139731	1.18914		4.6091	5.52584	3.19466	4.2278	5.50071	10	0.0014881	0.398416		0.995207		alpha-Aminoadipate
Carnitine		0.120816	0.0772979	0.0925666		0.946434	0.181353	0.929753		18.3006	17.3203	5.58573	13.2184	25.807	0	0	0.320289		0.983705		Carnitine
Phe		0.0691328	0.0431462	0.0532402		0.962741	0.103575	0.957255		6.8918	6.63502	5.07837	6.36931	8.07308	0	0	0.630274		0.994844		Phe
3-Methylhistidine		0.0530701	0.0388347	0.0366203		0.88687	0.121849	0.878902		81.0621	71.8916	38.2956	55.6441	96.8522	0	0	12.6874		0.996419		3-Methylhistidine
Arg		0.125659	0.0973385	0.0793081		2.2036	0.19677	2.19535		4.44596	9.79712	2.83887	3.65469	4.90585	2	0.000297619	0.329564		0.996748		Arg
Guanidinosuccinate		0.0644411	0.0323738	0.0554487		0.487798	0.135564	0.470163		6.38772	3.11591	4.29434	5.84177	7.89937	3	0.000446429	0.339016		0.982548		Guanidinosuccinate
Indole-3-acetate		0.295096	0.208129	0.210609		0.697713	0.255972	0.64896		7.55534	5.27146	4.60225	6.49206	9.09657	166	0.0247024	0.754066		0.821116		Indole-3-acetate
Citrulline		0.309305	0.169823	0.253611		2.1724	0.275291	2.15531		1.3569	2.94773	0.676716	1.00205	1.52463	410	0.0610119	0.132354		0.979728		Citrulline
Tyr		0.0622517	0.0368522	0.0499582		0.873069	0.111219	0.86615		14.2447	12.4366	9.46811	12.8172	17.1794	1	0.00014881	2.4072		0.994916		Tyr
SDMA		0.0956004	0.0671024	0.0704539		0.209974	0.113088	0.18006		7.82381	1.64279	6.6909	7.63966	8.82056	0	0	1.47227		0.792705		SDMA
ADMA		0.0906047	0.065793	0.0646889		0.237184	0.105992	0.214664		7.82097	1.85501	6.54034	7.6689	8.91737	0	0	2.64725		0.854074		ADMA
o-Acetylcarnitine		0.106433	0.073215	0.0779531		1.31908	0.185215	1.30643		7.66925	10.1164	2.12872	4.81661	9.28101	76	0.0113095	0.14495		0.99349		o-Acetylcarnitine
Trp		0.0603696	0.038022	0.0467179		0.506241	0.0970776	0.497238		11.309	5.72505	7.89801	10.4268	13.6735	1	0.00014881	1.37415		0.985779		Trp
Cystine		0.0704356	0.0369003	0.0598566		1.05207	0.155852	1.04106		12.8546	13.524	7.2679	9.65698	13.9795	1	0.00014881	1.85934		0.995518		Cystine
Uridine		0.116532	0.0933875	0.0689122		0.184091	0.111513	0.148342		81.0287	14.9167	71.0924	80.3407	90.0898	3	0.000446429	9.90018		0.599298		Uridine
Adenosine		0.197645	0.0977856	0.173469		0.370114	0.126386	0.34817		1.2266	0.453981	0.960764	1.2272	1.49266	218	0.0324405	0.0807902		0.714833		Adenosine
Ethanolamine		0.0956095	0.0508223	0.0817024		0.261276	0.0991843	0.243005		23.8248	6.22485	19.6041	23.4538	27.6696	0	0	3.11365		0.866093		Ethanolamine
Piperidine		0.0928188	0.0633327	0.0683942		1.58745	0.222704	1.57173		1.8904	3.00092	0.284077	0.774546	2.30974	90	0.0133929	0.0216678		0.996581		Piperidine
1-Methylhistamine		0.295366	0.157707	0.255461		0.476668	0.181727	0.438472		0.268323	0.127901	0.192193	0.253857	0.329167	296	0.0440476	0.0572569		0.616038		1-Methylhistamine
Imidazole-4-acetate		0.169424	0.0687963	0.154192		0.741656	0.154363	0.724667		1.10287	0.817952	0.786312	1.07121	1.38938	763	0.113542	0.187581		0.947815		Imidazole-4-acetate
N-Acetylputrescine		0.131125	0.101032	0.0837182		0.330734	0.144765	0.300323		6.27125	2.07411	4.79762	5.98122	7.41154	0	0	1.59456		0.842813		N-Acetylputrescine
5-Aminolevulinate		0.160911	0.0728554	0.143384		0.299941	0.110678	0.282694		0.954887	0.28641	0.771092	0.922607	1.10633	19	0.00282738	0.189709		0.712194		5-Aminolevulinate
gamma-Guanidinobutyrate		0.160645	0.07277	0.142544		1.41298	0.277977	1.38599		0.694581	0.98143	0.347252	0.493651	0.738997	317	0.0471726	0.0878125		0.987074		gamma-Guanidinobutyrate
4-(beta-Acetylaminoethyl)imidazole		0.339441	0.222709	0.260301		2.03297	0.181997	2.02503		0.713248	1.45001	0.0268651	0.324132	0.796762	2250	0.334821	0.0537301		0.972122		4-(beta-Acetylaminoethyl)imidazole
Allantoin		0.638534	0.556479	0.172014		0.572832	0.4577	0.27297		92.0276	52.7164	61.3198	81.1762	109.981	0	0	4.27576		-0.242548		Allantoin
7-Methylguanine		0.115072	0.0808427	0.0811955		0.324738	0.185634	0.265205		4.79437	1.55691	3.75508	4.90212	5.84295	0	0	0.417217		0.874432		7-Methylguanine
N1-Acetylspermidine		0.244733	0.204039	0.128409		0.45848	0.181108	0.419965		1.76263	0.808128	1.21955	1.61925	2.1287	2	0.000297619	0.0939975		0.715064		N1-Acetylspermidine
N8-Acetylspermidine		0.22384	0.187578	0.131437		0.360196	0.187046	0.304783		1.2042	0.433747	0.90495	1.14211	1.43125	0	0	0.0698241		0.613813		N8-Acetylspermidine
Gly-Leu		0.125154	0.051704	0.11426		0.360558	0.119508	0.340711		0.949754	0.342442	0.725075	0.900516	1.11388	18	0.00267857	0.190138		0.879514		Gly-Leu
N-epsilon-Acetyllysine		0.103604	0.0421456	0.0948037		0.286371	0.109543	0.266406		2.6267	0.752213	2.13157	2.55623	3.04743	4	0.000595238	0.660764		0.869114		N-epsilon-Acetyllysine
N6,N6,N6-Trimethyllysine		0.0887041	0.0683893	0.056829		0.450479	0.119104	0.435299		10.5865	4.769	7.91796	9.43258	11.7922	0	0	2.33303		0.961226		N6,N6,N6-Trimethyllysine
N-Acetylhistidine		0.170632	0.0618544	0.16037		0.377323	0.110609	0.362176		1.82432	0.688359	1.40335	1.73593	2.14902	3	0.000446429	0.342273		0.7955		N-Acetylhistidine
SAM+		0.155461	0.0880658	0.128465		0.297705	0.155393	0.254662		4.46987	1.3307	3.55513	4.38847	5.25188	21	0.003125	0.667714		0.727311		SAM+
N-Acetylglucosamine		0.167174	0.117893	0.115014		0.305651	0.114616	0.284123		17.8444	5.45415	14.707	17.2124	20.1833	3	0.000446429	3.48836		0.700853		N-Acetylglucosamine
Cystathionine		0.611487	0.421026	0.441823		5.54591	0.395435	5.53199		1.99888	11.0856	0.156102	0.156102	3.09763	3658	0.544345	0.312203		0.987843		Cystathionine
7,8-Dihydrobiopterin		0.337718	0.209432	0.280731		0.516282	0.200567	0.480663		1.8073	0.933074	1.31819	1.85255	2.36869	865	0.12872	0.282112		0.572107		7,8-Dihydrobiopterin
1-Methyladenosine		0.147729	0.102234	0.107534		0.249062	0.152344	0.201864		5.30674	1.32171	4.36548	5.18231	6.11124	3	0.000446429	0.745064		0.648183		1-Methyladenosine
Mean for cations		0.168505	0.104931	0.126165		1.24892	0.185399	1.22411		19.2267	16.0213	10.687	15.1724	23.71	285.304		1.38302		0.897845
Median for cations		0.117278	0.0693394	0.0895773		0.81251	0.155852	0.798915		6.38772	5.45415	3.75508	5.30815	7.7181	4		0.417217		0.982548
Metabolite name		QC samples				Participant samples													Estimated ICC*		Metabolite name
		Total CV	Inter-batch CV	Intra-batch CV		Total CV	Inter-batch CV	Intra-batch CV		Mean (µmol/L)	SD	1st quartile	Median	3rd Quartile		% of ND	Lowest detection value
Anions
Lactate		0.266223	0.201222	0.171098		0.743444	0.301225	0.674913		18.127	13.4764	11.325	16.4287	21.9557	0	0	1.46425		0.871769		Lactate
Malonate		5.93303	1.24017	5.80822		0.788119	0.352477	0.70984		1.15513	0.910383	0.68478	1.06503	1.49127	1136	0.169048	0.203664		-55.6721		Malonate
3-Hydroxybutyrate		0.118979	0.0814108	0.0834885		1.58815	0.12112	1.58353		11.2268	17.8299	6.46439	8.69564	12.1429	2	0.000297619	1.28935		0.994387		3-Hydroxybutyrate
4-Oxopentanoate		0.23159	0.162447	0.167562		0.394593	0.19731	0.344019		3.38121	1.3342	2.46799	3.18496	4.08096	39	0.00580357	0.413453		0.655539		4-Oxopentanoate
Succinate		0.176598	0.139647	0.112418		0.559062	0.249108	0.501102		11.1994	6.26114	7.01837	9.88929	13.8023	1	0.00014881	1.43299		0.900218		Succinate
2-Hydroxypentanoate		0.149887	0.111869	0.0983409		0.501678	0.157277	0.475604		15.0888	7.5697	10.5387	13.7985	18.2038	0	0	0.877815		0.910735		2-Hydroxypentanoate
Isethionate		0.108477	0.0732343	0.0804685		0.26639	0.12854	0.230841		18.017	4.79955	14.7777	17.4583	20.5528	0	0	6.24997		0.83418		Isethionate
5-Oxoproline		0.114989	0.0785092	0.0831135		0.256836	0.123654	0.22176		23.42	6.01509	19.6009	22.6322	26.3174	0	0	8.01002		0.799553		5-Oxoproline
4-Methyl-2-oxopentanoate		0.202879	0.106463	0.171191		0.512577	0.167957	0.483666		1.79303	0.919067	1.27845	1.66659	2.15934	273	0.040625	0.236242		0.843342		4-Methyl-2-oxopentanoate
Glutarate		0.51951	0.463732	0.208581		0.76242	0.534472	0.529892		14.3455	10.9373	8.07121	11.1013	16.1948	0	0	1.5445		0.535701		Glutarate
Malate		0.211697	0.167404	0.132287		2.36272	0.333783	2.34229		1.25365	2.96201	0.567646	0.897968	1.41674	135	0.0200893	0.111448		0.991972		Malate
Threonate		0.13156	0.104557	0.0798101		0.2631	0.145483	0.217166		72.4497	19.0615	60.3502	70.2128	82.248	0	0	24.7211		0.749961		Threonate
Ethanolamine phosphate		0.153508	0.093838	0.122449		0.616115	0.208468	0.580244		3.88558	2.39397	2.39953	3.58425	4.99119	386	0.0574405	0.293151		0.937922		Ethanolamine phosphate
2-Oxoglutarate		0.696607	0.146263	0.680174		0.789852	0.24092	0.749564		26.7363	21.1177	13.5895	21.5613	34.3629	213	0.0316964	1.95283		0.222172		2-Oxoglutarate
Pimelate		0.128399	0.110012	0.0746652		0.654278	0.231442	0.612555		7.99977	5.23407	4.52413	6.63746	9.86923	0	0	1.05744		0.961488		Pimelate
Urate		0.131574	0.108384	0.0686938		0.423251	0.304437	0.285348		412.452	174.57	282.518	395.625	517.792	0	0	54.0957		0.903363		Urate
Glycerophosphate		0.137982	0.0914087	0.0976499		0.622876	0.208958	0.586487		7.66165	4.77226	4.43181	6.702	9.75397	73	0.0108631	0.455261		0.950927		Glycerophosphate
trans-Aconitate		0.191909	0.170519	0.106615		0.440222	0.261198	0.361951		5.71797	2.51718	4.37743	5.22219	6.40451	0	0	1.86163		0.809959		trans-Aconitate
cis-Aconitate		0.156644	0.109157	0.114198		0.309951	0.167708	0.258789		32.5973	10.1036	25.4613	31.3236	38.0116	0	0	8.50501		0.744588		cis-Aconitate
N-Acetylaspartate		0.170684	0.145126	0.0985108		0.388565	0.196408	0.336265		7.71178	2.99652	5.42458	7.30398	9.54986	0	0	0.786281		0.807043		N-Acetylaspartate
Hippurate		0.146067	0.126643	0.0739115		0.941655	0.192285	0.92239		251.968	237.267	90.7068	187.267	335.865	3	0.000446429	3.04982		0.975939		Hippurate
Homovanillate		0.209944	0.199793	0.0772595		0.932564	0.209066	0.907825		42.987	40.0881	16.2071	30.0839	56.0302	2	0.000297619	2.27509		0.949318		Homovanillate
4-Pyridoxate		0.221594	0.180749	0.129827		1.30123	0.242089	1.27886		2.05147	2.66943	0.964023	1.3651	2.11101	1	0.00014881	0.126855		0.970999		4-Pyridoxate
Azelate		0.180034	0.105154	0.144725		0.760724	0.272335	0.7103		1.17897	0.896872	0.708811	0.979966	1.35729	20	0.00297619	0.143827		0.943991		Azelate
Isocitrate		0.118177	0.0957371	0.0708423		0.249414	0.13453	0.209925		53.1149	13.2476	43.7837	52.1477	61.1094	0	0	13.4506		0.775495		Isocitrate
Citrate		0.163266	0.1515	0.0562866		0.549153	0.241201	0.491205		439.199	241.188	264.608	399.419	574.418	0	0	1.05362		0.91161		Citrate
Quinate		0.122392	0.0911189	0.0865179		1.12498	0.208642	1.10637		13.6798	15.3895	3.01921	9.0316	19.2714	367	0.0546131	0.138193		0.988164		Quinate
Glucuronate		0.16091	0.108413	0.112811		0.34539	0.16413	0.30251		32.0203	11.0595	24.9109	30.0512	36.925	18	0.00267857	1.35456		0.782957		Glucuronate
Cysteine S-sulfate		0.475091	0.27277	0.389894		0.523064	0.223264	0.47197		1.66369	0.870218	1.17344	1.55445	2.0337	214	0.0318452	0.208839		0.175021		Cysteine S-sulfate
Mucate		0.193714	0.126915	0.145778		0.686423	0.274317	0.633123		2.40025	1.64759	1.5558	2.0714	2.74404	44	0.00654762	0.368422		0.920358		Mucate
3-Indoxyl sulfate		0.130641	0.110532	0.0691705		0.669324	0.196852	0.639634		56.4531	37.7854	30.8054	48.2013	71.846	1	0.00014881	1.14812		0.961903		3-Indoxyl sulfate
Glycolate		0.213278	0.146312	0.156317		0.450989	0.193469	0.408052		20.4506	9.22302	14.8608	19.5275	24.9364	231	0.034375	2.16015		0.776354		Glycolate
Oxamate		0.211879	0.133955	0.169075		1.04398	0.234777	1.01818		3.77877	3.94498	1.81153	3.11509	4.80945	1106	0.164583	0.528492		0.95881		Oxamate
3-Hydroxypropionate		3.61234	0.775672	3.52628		1.02348	0.361669	0.959617		2.85506	2.92209	0.340468	2.53037	4.30082	2530	0.376488	0.680936		-11.4572		3-Hydroxypropionate
2-Hydroxyisobutyrate		0.142821	0.0965214	0.1044		0.335773	0.122015	0.311336		4.88018	1.63863	3.73726	4.69003	5.8161	2	0.000297619	0.360771		0.819077		2-Hydroxyisobutyrate
Itaconate		7.9294	1.39466	7.80833		0.743021	0.250189	0.702904		0.322235	0.239427	0.182068	0.29992	0.438833	1334	0.198512	0.0452661		-112.888		Itaconate
N-Acetyl-beta-alanine		0.159951	0.10538	0.117401		0.621811	0.161766	0.599528		2.10452	1.30861	1.26465	1.80337	2.59462	58	0.00863095	0.267076		0.933831		N-Acetyl-beta-alanine
3-Ureidopropionate		0.690878	0.242837	0.647756		1.24514	0.143926	1.2371		2.64217	3.28987	1.81695	2.43145	3.17927	549	0.0816964	0.412004		0.69213		3-Ureidopropionate
Adipate		0.147649	0.097314	0.112984		0.55435	0.193265	0.520658		4.42005	2.45026	2.86576	3.86427	5.30773	32	0.0047619	0.825955		0.92906		Adipate
p-Hydroxyphenylacetate		0.205171	0.172273	0.120102		0.944072	0.232296	0.915406		22.9049	21.6239	11.8931	17.6604	27.0219	185	0.0275298	0.978889		0.95277		p-Hydroxyphenylacetate
3-Hydroxy-3-methylglutarate		0.218773	0.152569	0.161133		0.354112	0.205617	0.290131		3.31894	1.17528	2.49254	3.17233	3.93951	0	0	0.825468		0.618312		3-Hydroxy-3-methylglutarate
2,3-Pyridinedicarboxylate		0.189722	0.13046	0.13775		0.389178	0.167407	0.351881		4.97468	1.93604	3.69997	4.66476	5.89548	36	0.00535714	1.10058		0.76235		2,3-Pyridinedicarboxylate
4-Hydroxymandelate		0.267938	0.189337	0.188944		0.423234	0.192389	0.377063		3.22415	1.36457	2.36562	2.99327	3.79454	65	0.00967262	0.911154		0.599218		4-Hydroxymandelate
Suberate		0.163312	0.131462	0.105727		0.690768	0.197799	0.662422		2.92968	2.02373	1.65848	2.41799	3.55767	5	0.000744048	0.380584		0.944105		Suberate
Allantoate		0.333724	0.130075	0.307085		1.18942	0.269672	1.15938		2.66061	3.16459	0.418668	1.93146	3.52491	1703	0.253423	0.197858		0.921277		Allantoate
3PG		4.83361	1.05402	4.71881		0.912873	0.408314	0.817841		0.776328	0.708688	0.0847236	0.764621	1.20613	2647	0.393899	0.169447		-27.0365		3PG
N-Acetylglutamate		0.143473	0.0980116	0.106236		0.364679	0.145597	0.335347		2.94674	1.07461	2.18816	2.77523	3.50237	1	0.00014881	0.76489		0.845218		N-Acetylglutamate
o-Hydroxyhippurate		6.43214	0.715521	6.39305		6.71175	0.161322	6.70985		2.56063	17.1863	0.356769	0.660332	1.19553	1097	0.163244	0.0973679		0.081584		o-Hydroxyhippurate
Gluconate		0.144334	0.119408	0.0938309		0.358216	0.190414	0.308391		63.4459	22.7274	47.6856	60.9776	76.4032	41	0.00610119	7.69583		0.837651		Gluconate
4-Hydroxy-3-methoxymandelate		0.195645	0.154614	0.12739		0.35354	0.171202	0.312117		4.46147	1.57731	3.36672	4.25014	5.33042	11	0.0016369	0.453171		0.693762		4-Hydroxy-3-methoxymandelate
Saccharate		0.164816	0.114541	0.115905		0.489478	0.143461	0.4695		5.10927	2.50088	3.94362	4.75584	5.73879	2	0.000297619	1.24785		0.886621		Saccharate
Pantothenate		0.140392	0.095024	0.104588		1.00067	0.189569	0.983242		3.02165	3.02368	1.75918	2.54754	3.55988	50	0.00744048	0.206454		0.980316		Pantothenate
Biotin		0.443673	0.303172	0.331569		2.26577	1.51588	1.74032		1.08222	2.45205	0.0668773	0.0668773	1.29746	3634	0.540774	0.133755		0.961656		Biotin
N-Acetylneuraminate		0.176184	0.184486	0.071838		0.216686	0.0911966	0.196478		18.1476	3.93233	15.5807	17.9385	20.4426	14	0.00208333	1.66844		0.338893		N-Acetylneuraminate
Mean for anions		0.726216	0.226154	0.660057		0.81502	0.239516	0.761975		32.888	19.0626	20.1621	29.3149	41.3483	338.167		2.98134		-3.08779
Median for anions		0.178316	0.130961	0.116653		0.618963	0.197555	0.555068		5.04198	3.22723	3.71862	4.72294	5.85579	19		0.825711		0.84428
CV: coefficient of variation, ICC: intraclass correlation coefficient, ND: not detectable values, QC: quality control, SD: standard deviation
*ICC was estimated by following; 1 - (Total CV of QC samples )^2 / (Total CV of subject samples )^2
