# Supplementary material for: Reliability of Urinary Charged Metabolite Concentrations in a Large-Scale Cohort Study Using Capillary Electrophoresis-Mass Spectrometry
Source: Research Square preprint supplement (doi:10.21203/rs.3.rs-110925/v1), 2020-11-25
Supplement: Supplementary file 3 [file 81e4a311bed034a4f41e9210.xlsx]

## Sheet: S1 Table
Table S3. Statistical summary of measured metabolites by exclusion with the creatinine revels. (excluding samples of creatinine >3.0 g / L or <0.3 g / L in participants)
Metabolite name		Participant samples													Estimated ICC*		Metabolite name
		Total CV	Inter-batch CV	Intra-batch CV		Mean (µmol/L)	SD	1st quartile	Median	3rd Quartile	Number of ND	% of ND	Lowest detection value
Cations																	Cations
Gly		0.685323	0.202963	0.65607		76.0336	52.1075	42.5235	61.5894	91.9714	0	0	5.1122		0.99335		Gly
Trimethylamine N-oxide		1.14302	0.29376	1.10598		64.7071	73.9613	21.886	36.9592	78.2288	19	0.00288097	0.10927		0.991258		Trimethylamine N-oxide
beta-Ala		0.910665	0.147828	0.898677		1.27118	1.15762	0.672142	1.15434	1.69866	1054	0.159818	0.190822		0.96132		beta-Ala
Ala		0.695164	0.135938	0.682037		21.2306	14.7587	13.2435	18.0969	25.5326	0	0	3.65387		0.992377		Ala
3-Aminoisobutyrate		1.14449	0.119897	1.13837		49.8009	56.9966	6.23284	18.8877	95.1542	0	0	0.434819		0.996784		3-Aminoisobutyrate
2AB		0.828889	0.132859	0.818062		1.10447	0.91548	0.760063	1.02479	1.36123	291	0.0441243	0.215731		0.945164		2AB
N,N-Dimethylglycine		3.26701	0.157336	3.26338		6.97336	22.782	3.67574	5.35451	7.76253	13	0.00197119	0.574026		0.999191		N,N-Dimethylglycine
Choline		0.495805	0.14593	0.473745		3.51976	1.74512	2.48432	3.21693	4.11629	0	0	0.846599		0.93391		Choline
Ser		0.545702	0.111513	0.534673		33.1098	18.0681	23.2789	29.6488	38.8752	34	0.00515542	0.400424		0.988525		Ser
Pro		1.42599	0.198851	1.41287		0.93966	1.33995	0.555905	0.761368	1.03322	486	0.0736922	0.15494		0.983918		Pro
Guanidinoacetate		0.495088	0.152698	0.47225		59.7076	29.5605	37.8935	54.7793	76.4479	0	0	2.40547		0.983108		Guanidinoacetate
Val		2.87287	0.133547	2.86981		4.2914	12.3286	3.27707	4.01106	4.84003	109	0.0165277	0.262278		0.997099		Val
Betaine		1.48149	0.214119	1.46676		20.1471	29.8478	8.84263	12.8749	20.3941	21	0.00318423	2.11125		0.994339		Betaine
Thr		0.95106	0.168836	0.936011		15.723	14.9535	9.35183	12.784	18.1644	2	0.00030326	1.3074		0.99712		Thr
Taurine		0.697004	0.151072	0.680044		173.517	120.942	97.7521	151.319	218.031	5	0.00075815	6.32531		0.969845		Taurine
Creatine		1.52609	0.400278	1.47259		73.987	112.911	7.78554	21.3943	95.434	0	0	1.69823		0.998703		Creatine
Ile		13.8661	0.638245	13.8516		1.52975	21.2116	0.948348	1.18379	1.47496	47	0.00712661	0.0561648		0.999573		Ile
Leu		3.66795	0.12473	3.66586		3.51386	12.8887	2.56456	3.16014	3.88591	37	0.00561031	0.0982451		0.999079		Leu
Asn		0.810474	0.142233	0.798088		12.019	9.74112	7.93743	10.3231	13.8683	14	0.00212282	1.79111		0.987411		Asn
Ornithine		1.78655	0.185347	1.77748		1.95312	3.48934	1.17155	1.5278	2.05197	40	0.0060652	0.330551		0.993343		Ornithine
Asp		3.38003	0.511767	3.34065		0.304235	1.02832	0.0950887	0.0950887	0.0950887	5447	0.825929	0.190177		0.840944		Asp
Hypoxanthine		0.497764	0.175109	0.466541		13.104	6.52271	8.90429	12.3194	16.2363	2	0.00030326	1.02825		0.980229		Hypoxanthine
1-Methylnicotinamide		0.464333	0.166338	0.432106		10.4519	4.85317	7.03338	9.76408	13.0405	0	0	0.651568		0.880675		1-Methylnicotinamide
Trigonelline		0.932985	0.201028	0.911464		16.1655	15.0821	6.59361	11.3734	20.5114	1	0.00015163	0.50864		0.985266		Trigonelline
Urocanate		0.567336	0.205057	0.530479		2.2864	1.29716	1.63533	2.26477	2.96048	781	0.118423	0.651805		0.781228		Urocanate
Proline betaine		1.45813	0.320537	1.42357		15.3542	22.3884	3.67268	6.88247	17.1027	4	0.00060652	0.622585		0.993769		Proline betaine
gamma-Butyrobetaine		1.12569	0.177313	1.11267		0.359089	0.404222	0.0901341	0.269896	0.485059	1556	0.235936	0.0415806		0.962976		gamma-Butyrobetaine
Gln		0.841881	0.142289	0.83024		61.4364	51.7221	42.2865	55.6503	73.363	2	0.00030326	5.66847		0.995065		Gln
Lys		1.40666	0.170352	1.39654		41.2743	58.0589	15.4535	26.4467	47.5298	0	0	2.52443		0.998382		Lys
Glu		0.655235	0.129122	0.642282		2.31542	1.51714	1.62135	2.16514	2.79114	165	0.025019	0.371818		0.941677		Glu
Met		1.79364	0.125229	1.78931		1.46426	2.62636	1.07697	1.36979	1.71922	230	0.0348749	0.282871		0.97614		Met
His		0.549919	0.0917042	0.542361		86.6166	47.6321	54.7618	77.8145	108.533	0	0	2.55866		0.986022		His
alpha-Aminoadipate		1.1976	0.13208	1.18879		4.6491	5.56776	3.23358	4.26401	5.52725	10	0.0015163	0.40038		0.995205		alpha-Aminoadipate
Carnitine		0.942211	0.172499	0.926989		18.446	17.38	5.66733	13.3286	25.9685	0	0	0.320289		0.983605		Carnitine
Phe		0.964301	0.096694	0.959512		6.93419	6.68665	5.12232	6.40297	8.12195	0	0	0.630274		0.994802		Phe
3-Methylhistidine		0.884759	0.119163	0.877084		81.5126	72.119	38.5026	55.9646	97.594	0	0	12.6874		0.99628		3-Methylhistidine
Arg		2.2083	0.191143	2.20051		4.47645	9.88534	2.86242	3.68098	4.9226	2	0.00030326	0.329564		0.996697		Arg
Guanidinosuccinate		0.486594	0.133065	0.469813		6.4172	3.12257	4.32249	5.87476	7.92834	3	0.00045489	0.641614		0.981411		Guanidinosuccinate
Indole-3-acetate		0.688417	0.244674	0.642902		7.64399	5.26225	4.69157	6.55126	9.15227	164	0.0248673	1.38269		0.814805		Indole-3-acetate
Citrulline		2.1679	0.265731	2.1519		1.37144	2.97315	0.688982	1.01253	1.53676	409	0.0620167	0.132354		0.980754		Citrulline
Tyr		0.872611	0.103835	0.866547		14.3443	12.517	9.56443	12.9256	17.2821	1	0.00015163	2.4072		0.994894		Tyr
SDMA		0.208933	0.112743	0.17949		7.84566	1.63922	6.71154	7.65759	8.83935	0	0	1.47227		0.796796		SDMA
ADMA		0.235136	0.103361	0.213959		7.8555	1.84711	6.58903	7.71039	8.95736	0	0	2.94427		0.856262		ADMA
o-Acetylcarnitine		1.31609	0.184026	1.30362		7.70862	10.1453	2.17296	4.85785	9.3003	76	0.0115239	0.163817		0.993364		o-Acetylcarnitine
Trp		0.504209	0.0901741	0.496348		11.3792	5.73752	7.97732	10.4752	13.7373	1	0.00015163	1.37415		0.985437		Trp
Cystine		1.05088	0.146869	1.04103		12.9638	13.6233	7.33614	9.74473	14.1051	1	0.00015163	1.85934		0.995319		Cystine
Uridine		0.182529	0.109888	0.147743		81.316	14.8425	71.4495	80.5904	90.2881	3	0.00045489	9.90018		0.543468		Uridine
Adenosine		0.368476	0.122249	0.347999		1.23329	0.454436	0.969137	1.23479	1.49861	218	0.0330553	0.0807902		0.716747		Adenosine
Ethanolamine		0.258259	0.094172	0.241486		23.948	6.1848	19.7392	23.5578	27.7452	0	0	3.11365		0.86519		Ethanolamine
Piperidine		1.58126	0.214445	1.56672		1.91029	3.02066	0.286217	0.787363	2.32915	90	0.0136467	0.0216678		0.996569		Piperidine
1-Methylhistamine		0.474737	0.177762	0.437816		0.270092	0.128222	0.194219	0.255499	0.331139	296	0.0448825	0.0572569		0.605177		1-Methylhistamine
Imidazole-4-acetate		0.741213	0.153526	0.724556		1.10632	0.820023	0.791154	1.0757	1.39505	762	0.115542	0.187581		0.94947		Imidazole-4-acetate
N-Acetylputrescine		0.329491	0.142611	0.29998		6.29847	2.07529	4.82877	6.01022	7.43862	0	0	1.59456		0.839108		N-Acetylputrescine
5-Aminolevulinate		0.297924	0.106469	0.281716		0.959651	0.285903	0.775475	0.926524	1.10974	19	0.00288097	0.189709		0.704123		5-Aminolevulinate
gamma-Guanidinobutyrate		1.41345	0.273933	1.38706		0.699842	0.98919	0.350346	0.497023	0.747199	317	0.0480667	0.0878125		0.987347		gamma-Guanidinobutyrate
4-(beta-Acetylaminoethyl)imidazole		2.03338	0.1743	2.02611		0.718378	1.46074	0.0268651	0.326623	0.802257	2213	0.335557	0.0537301		0.972331		4-(beta-Acetylaminoethyl)imidazole
Allantoin		0.568094	0.453478	0.264282		92.9207	52.7876	62.479	82.0107	111.323	0	0	4.27576		-0.220064		Allantoin
7-Methylguanine		0.316754	0.175937	0.260823		4.83775	1.53238	3.81979	4.9354	5.86116	0	0	0.661655		0.869723		7-Methylguanine
N1-Acetylspermidine		0.458184	0.180566	0.419564		1.76609	0.809193	1.22389	1.62237	2.13267	2	0.00030326	0.0939975		0.723805		N1-Acetylspermidine
N8-Acetylspermidine		0.361093	0.187225	0.305206		1.2054	0.43526	0.905012	1.14232	1.4337	0	0	0.0698241		0.618096		N8-Acetylspermidine
Gly-Leu		0.357855	0.114974	0.339427		0.955201	0.341824	0.731859	0.906577	1.1176	18	0.00272934	0.190138		0.874317		Gly-Leu
N-epsilon-Acetyllysine		0.282427	0.103224	0.264447		2.64309	0.746478	2.15011	2.57157	3.05638	4	0.00060652	0.660764		0.863488		N-epsilon-Acetyllysine
N6,N6,N6-Trimethyllysine		0.449705	0.11596	0.43526		10.6364	4.78324	7.95629	9.46667	11.8402	0	0	2.33303		0.962608		N6,N6,N6-Trimethyllysine
N-Acetylhistidine		0.375269	0.105271	0.361417		1.83502	0.688626	1.41595	1.74675	2.15574	3	0.00045489	0.342273		0.80182		N-Acetylhistidine
SAM+		0.293097	0.149272	0.252517		4.50099	1.31923	3.59966	4.4197	5.27464	21	0.00318423	0.667714		0.720868		SAM+
N-Acetylglucosamine		0.303849	0.11084	0.283465		17.9347	5.44944	14.7945	17.2989	20.2335	3	0.00045489	3.48836		0.687319		N-Acetylglucosamine
Cystathionine		4.96496	0.421574	4.9475		1.94775	9.67052	0.156102	0.156102	3.12463	3583	0.54329	0.312203		0.983948		Cystathionine
7,8-Dihydrobiopterin		0.513856	0.198229	0.479712		1.81872	0.934562	1.34267	1.86675	2.38026	860	0.130402	0.282112		0.589167		7,8-Dihydrobiopterin
1-Methyladenosine		0.247991	0.15094	0.201683		5.32394	1.32029	4.37854	5.2008	6.12477	3	0.00045489	0.745064		0.64839		1-Methyladenosine
Mean for cations		1.21554	0.181257	1.19112		19.3702	16.0062	10.8097	15.2975	23.8755	#REF!		1.43964		0.894151
Median for cations		0.741213	0.151072	0.724556		6.4172	5.44944	3.81979	5.35451	7.76253	#REF!		0.622585		0.980754
Metabolite name		Participant samples													Estimated ICC*		Metabolite name
		Total CV	Inter-batch CV	Intra-batch CV		Mean (µmol/L)	SD	1st quartile	Median	3rd Quartile		% of ND	Lowest detection value
Anions
Lactate		0.740568	0.300439	0.671667		18.2882	13.5437	11.5189	16.5658	22.0827	0	0	1.46425		0.870771		Lactate
Malonate		0.784311	0.349906	0.70693		1.16454	0.913366	0.701661	1.07286	1.49539	1084	0.164367	0.256302		-56.2237		Malonate
3-Hydroxybutyrate		1.4634	0.139694	1.45692		11.1873	16.3715	6.5118	8.74481	12.2077	2	0.00030326	1.49154		0.99339		3-Hydroxybutyrate
4-Oxopentanoate		0.393794	0.196689	0.342916		3.3896	1.3348	2.47546	3.19127	4.09111	39	0.00591357	0.413453		0.654139		4-Oxopentanoate
Succinate		0.555215	0.243759	0.499344		11.2962	6.2718	7.12008	9.98349	13.9129	1	0.00015163	1.43299		0.898831		Succinate
2-Hydroxypentanoate		0.498945	0.152697	0.473956		15.177	7.57251	10.6396	13.8725	18.2581	0	0	0.877815		0.909754		2-Hydroxypentanoate
Isethionate		0.265611	0.127643	0.231046		18.0784	4.80183	14.8712	17.5196	20.6178	0	0	6.24997		0.833207		Isethionate
5-Oxoproline		0.254737	0.122167	0.220143		23.5028	5.98704	19.734	22.7129	26.373	0	0	8.01002		0.796237		5-Oxoproline
4-Methyl-2-oxopentanoate		0.509715	0.166853	0.481302		1.80483	0.919948	1.29191	1.6748	2.17159	262	0.0397271	0.236242		0.841577		4-Methyl-2-oxopentanoate
Glutarate		0.759449	0.53063	0.525642		14.4388	10.9656	8.14109	11.185	16.3022	0	0	1.5445		0.53206		Glutarate
Malate		2.36014	0.32497	2.34065		1.26606	2.98809	0.576974	0.907946	1.42707	126	0.0191054	0.115914		0.991954		Malate
Threonate		0.262154	0.144123	0.2171		72.7275	19.0658	60.5939	70.4893	82.4498	0	0	24.7211		0.748153		Threonate
Ethanolamine phosphate		0.610442	0.200865	0.57693		3.92253	2.39447	2.44483	3.61018	5.02073	354	0.053677	0.493635		0.936762		Ethanolamine phosphate
2-Oxoglutarate		0.786946	0.236069	0.747823		26.9549	21.212	13.7195	21.7896	34.6998	212	0.0321456	1.95283		0.216416		2-Oxoglutarate
Pimelate		0.651509	0.229352	0.610933		8.03702	5.2362	4.57292	6.66296	9.90531	0	0	1.05744		0.96116		Pimelate
Urate		0.411987	0.29228	0.279352		417.594	172.043	289.253	400.124	520.871	0	0	55.4392		0.898006		Urate
Glycerophosphate		0.616811	0.201338	0.582791		7.73139	4.76881	4.52211	6.77147	9.83901	72	0.0109174	0.654438		0.949957		Glycerophosphate
trans-Aconitate		0.442636	0.261201	0.364032		5.726	2.53453	4.37739	5.22278	6.4172	0	0	1.86163		0.812026		trans-Aconitate
cis-Aconitate		0.307283	0.164453	0.257096		32.7728	10.0705	25.6441	31.4895	38.1386	0	0	8.50501		0.740133		cis-Aconitate
N-Acetylaspartate		0.385739	0.19287	0.335073		7.76239	2.99426	5.48527	7.3655	9.58711	0	0	0.786281		0.804206		N-Acetylaspartate
Hippurate		0.939342	0.191602	0.920168		252.781	237.447	91.0511	187.737	337.449	3	0.00045489	3.04982		0.97582		Hippurate
Homovanillate		0.93251	0.210644	0.907565		43.1331	40.222	16.2713	30.1738	56.1974	1	0.00015163	2.27509		0.949313		Homovanillate
4-Pyridoxate		1.3008	0.238952	1.27894		2.06468	2.68574	0.968705	1.37541	2.12119	1	0.00015163	0.126855		0.97098		4-Pyridoxate
Azelate		0.757606	0.267136	0.708309		1.18906	0.900838	0.717583	0.986063	1.36533	20	0.0030326	0.143827		0.943529		Azelate
Isocitrate		0.248356	0.133899	0.209915		53.3058	13.2388	44.0665	52.3499	61.3023	0	0	13.4506		0.773578		Isocitrate
Citrate		0.54348	0.235658	0.487636		443.312	240.931	267.571	403.295	577.461	0	0	1.05362		0.909755		Citrate
Quinate		1.12505	0.20502	1.10694		13.6715	15.3812	3.02175	9.03405	19.2567	362	0.0548901	0.138193		0.988165		Quinate
Glucuronate		0.345486	0.162959	0.303269		32.1064	11.0923	24.9633	30.1296	37.0221	18	0.00272934	1.35456		0.783078		Glucuronate
Cysteine S-sulfate		0.517781	0.217223	0.46913		1.67941	0.869565	1.19484	1.56481	2.04222	206	0.0312358	0.208839		0.158099		Cysteine S-sulfate
Mucate		0.685758	0.270777	0.633682		2.41648	1.65712	1.56841	2.08505	2.76231	44	0.00667172	0.368422		0.920204		Mucate
3-Indoxyl sulfate		0.667324	0.194186	0.6386		56.8203	37.9176	31.192	48.521	72.45	1	0.00015163	1.14812		0.961675		3-Indoxyl sulfate
Glycolate		0.445599	0.186445	0.404778		20.6038	9.18102	15.0702	19.6633	25.0401	229	0.0347233	2.16015		0.770911		Glycolate
Oxamate		1.04342	0.230785	1.01861		3.80599	3.97123	1.82987	3.14507	4.8353	1082	0.164064	0.528492		0.958765		Oxamate
3-Hydroxypropionate		1.00493	0.363053	0.939028		2.86924	2.88339	0.340468	2.58289	4.34143	2461	0.373161	0.680936		-11.9212		3-Hydroxypropionate
2-Hydroxyisobutyrate		0.334061	0.120748	0.309828		4.89744	1.63604	3.75426	4.7075	5.82995	2	0.00030326	0.360771		0.817218		2-Hydroxyisobutyrate
Itaconate		0.743486	0.25045	0.7037		0.323829	0.240763	0.183606	0.301933	0.442221	1299	0.196967	0.0601505		-112.746		Itaconate
N-Acetyl-beta-alanine		0.617914	0.157852	0.596694		2.12169	1.31102	1.28304	1.82319	2.60673	55	0.00833965	0.267076		0.932994		N-Acetyl-beta-alanine
3-Ureidopropionate		1.24922	0.141067	1.24155		2.65548	3.31728	1.8319	2.44684	3.19378	525	0.0796058	0.412004		0.69414		3-Ureidopropionate
Adipate		0.548725	0.192521	0.515429		4.4394	2.43601	2.88647	3.88581	5.3241	32	0.00485216	0.825955		0.927598		Adipate
p-Hydroxyphenylacetate		0.940386	0.226505	0.91316		23.092	21.7154	12.0598	17.7972	27.1447	155	0.0235027	0.978889		0.952399		p-Hydroxyphenylacetate
3-Hydroxy-3-methylglutarate		0.352836	0.205343	0.289369		3.33358	1.17621	2.50376	3.18858	3.95245	0	0	0.825468		0.615547		3-Hydroxy-3-methylglutarate
2,3-Pyridinedicarboxylate		0.387686	0.165753	0.351331		4.9942	1.93618	3.72175	4.68258	5.91262	36	0.00545868	1.10058		0.760516		2,3-Pyridinedicarboxylate
4-Hydroxymandelate		0.423186	0.192336	0.377229		3.23832	1.37041	2.37501	3.0071	3.81751	65	0.00985595	0.911154		0.599127		4-Hydroxymandelate
Suberate		0.688442	0.196247	0.660686		2.94305	2.02612	1.6693	2.42668	3.57472	5	0.00075815	0.380584		0.943727		Suberate
Allantoate		1.18741	0.270105	1.15712		2.67412	3.17527	0.0989292	1.9543	3.5532	1653	0.250644	0.197858		0.921009		Allantoate
3PG		0.907621	0.402544	0.815062		0.78414	0.711702	0.0847236	0.775244	1.21765	2544	0.385747	0.281884		-27.3619		3PG
N-Acetylglutamate		0.362814	0.143093	0.334469		2.96238	1.07479	2.20707	2.78692	3.51801	1	0.00015163	0.76489		0.843622		N-Acetylglutamate
o-Hydroxyhippurate		6.69812	0.165643	6.69611		2.58897	17.3412	0.359997	0.66678	1.20099	1065	0.161486	0.0973679		0.0778426		o-Hydroxyhippurate
Gluconate		0.357513	0.18888	0.308513		63.7028	22.7746	47.7866	61.3504	76.651	40	0.0060652	7.69583		0.837012		Gluconate
4-Hydroxy-3-methoxymandelate		0.353219	0.172088	0.311564		4.47103	1.57925	3.37816	4.26014	5.33899	11	0.00166793	0.453171		0.693204		4-Hydroxy-3-methoxymandelate
Saccharate		0.490991	0.143445	0.471174		5.11973	2.51374	3.94922	4.76552	5.75411	2	0.00030326	1.24785		0.887319		Saccharate
Pantothenate		0.996857	0.184514	0.980318		3.04757	3.03799	1.78309	2.57128	3.57328	45	0.00682335	0.206454		0.980165		Pantothenate
Biotin		2.25417	1.49573	1.73277		1.09646	2.47161	0.0668773	0.0668773	1.31005	3493	0.529644	0.133755		0.961261		Biotin
N-Acetylneuraminate		0.216473	0.0904992	0.196828		18.187	3.93699	15.6225	17.9845	20.4853	14	0.00212282	1.66844		0.337589		N-Acetylneuraminate
Mean for anions		0.809814	0.236883	0.757614		33.1343	19.0028	20.4005	29.5379	41.554	326.333		3.02078		-3.11144
Median for anions		0.613627	0.196468	0.551286		5.05697	3.24627	3.738	4.73651	5.87129	19		0.825711		0.8426
CV: coefficient of variation, ICC: intraclass correlation coefficient, ND: not detectable values, QC: quality control, SD: standard deviation
*ICC was estimated by following; 1 - (Total CV of QC samples )^2 / (Total CV of subject samples )^2
